# Supplementary material for: Soluble Spike DNA Vaccine Provides Long-Term Protective Immunity against SARS-CoV-2 in Mice and Nonhuman Primates
Source: MDPI journal article supplement (doi:10.3390/vaccines9040307), 2021-03-24
Supplement: s1 [file s1]

Supplementary:

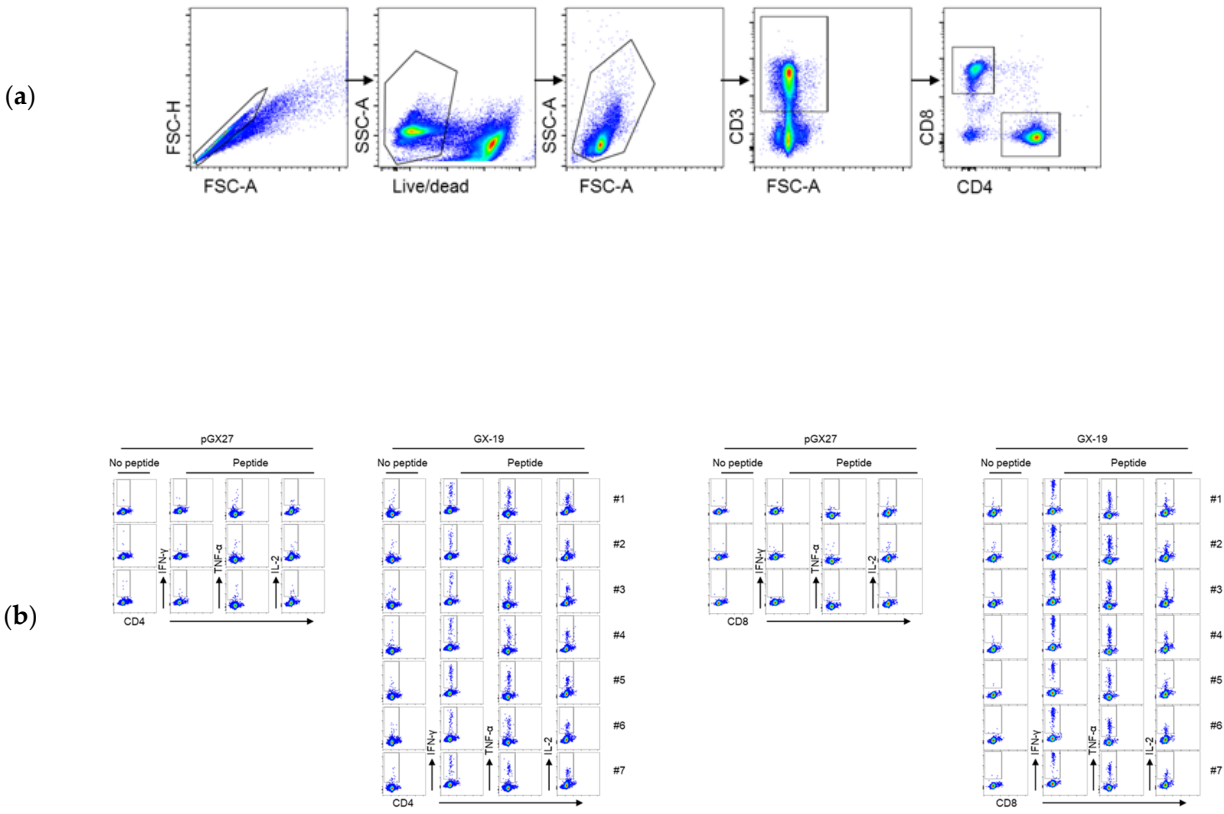

**Figure 1.** Flow cytometry panel to quantify SARS-CoV-2 S-specific mouse CD4<sup>+</sup> or CD8<sup>+</sup> T cells.

Mouse splenocytes were stimulated with specific peptide pools and then analyzed with multicolor flow cytometry to simultaneously detect SARS-CoV-2 S-specific expression of IFN- $\gamma$ , TNF- $\alpha$ , and IL-2. Gating strategy to identify CD4<sup>+</sup> or CD8<sup>+</sup> T cells (a). The representative plots show the frequencies of IFN- $\gamma$ , TNF- $\alpha$ , IL-2 producing CD4<sup>+</sup> or CD8<sup>+</sup> T cells, respectively (b).

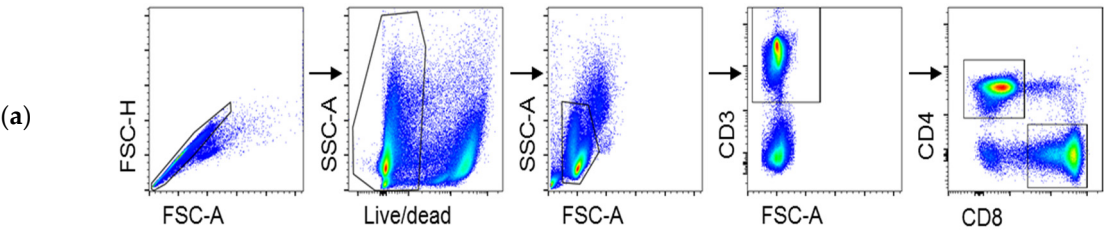

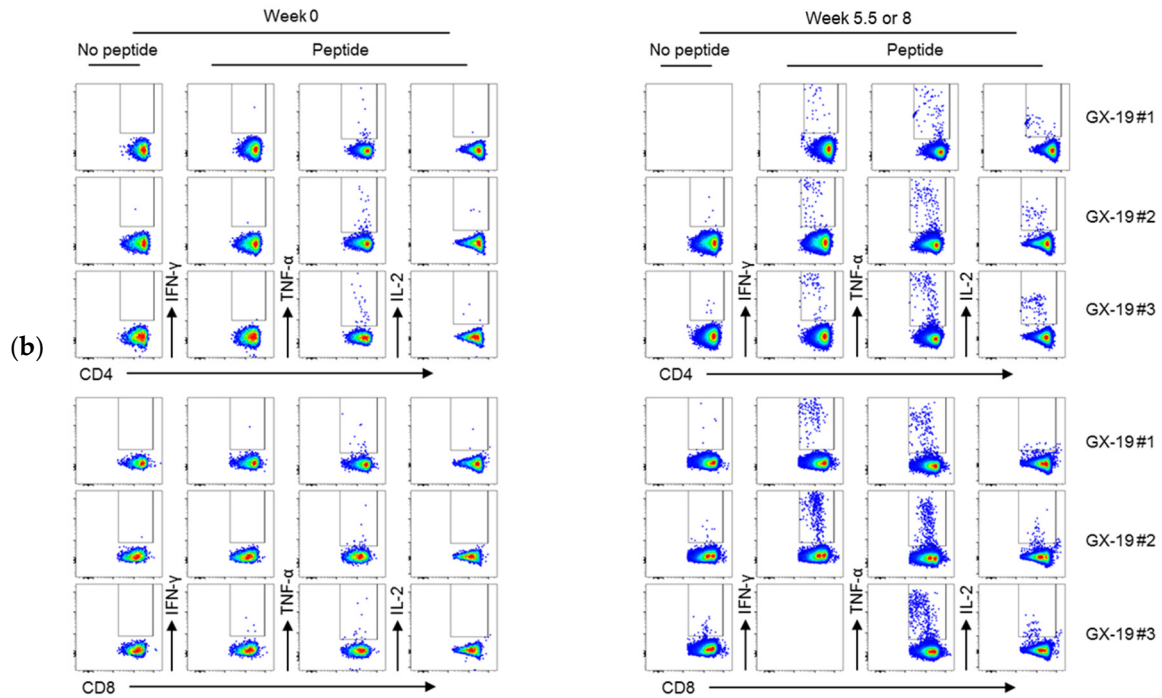

**Figure 2.** Flow cytometry panel to quantify SARS-CoV-2 S-specific NHP CD4<sup>+</sup> or CD8<sup>+</sup> T cells.

Cryopreserved PBMCs of GX-19 vaccinated macaques were stimulated with specific peptide pools and then analyzed with multicolor flow cytometry to simultaneously detect SARS-CoV-2 S-specific expression of IFN- $\gamma$ , TNF- $\alpha$ , and IL-2. Gating strategy to identify CD4<sup>+</sup> or CD8<sup>+</sup> T cells (a). The representative plots show the frequencies of IFN- $\gamma$ , TNF- $\alpha$ , IL-2 producing CD4<sup>+</sup> or CD8<sup>+</sup> T cells, respectively (b).

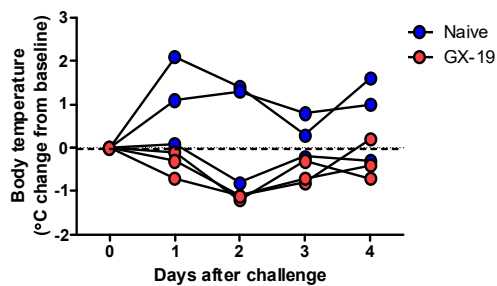

(a)

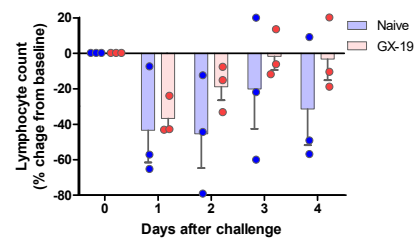

(b)

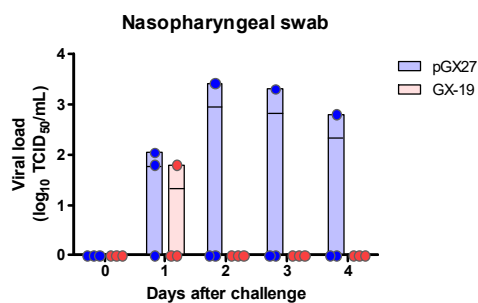

(c)

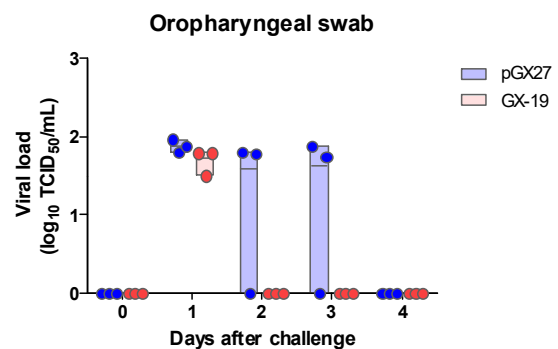

(d)

**Figure 3.** Clinical signs and TCID<sub>50</sub>/mL in macaques challenged with SARS-CoV-2 after vaccination with GX-19.

Non-vaccinated and vaccinated macaques ( $n=3/\text{group}$ ) were challenged with  $2.7 \times 10^7$  TCID<sub>50</sub> SARS-CoV-2. After viral challenge, macaques were anesthetized for checking body temperature **(a)**, and blood lymphocyte count **(b)** at 0, 1, 2, 3, and 4 days post-infection (dpi). TCID<sub>50</sub>/mL was measured in nasopharyngeal **(c)**, and oropharyngeal **(d)** at multiple time-points following challenge. *P* values determined by Mann-Whitney test;
